# Supplementary material for: Er3+-doped YbPO4 up-conversion porous nanospheres for UCL/CT bimodal imaging in vivo and chemotherapy
Source: Royal Society of Chemistry journal article supplement (doi:10.1039/c4tb00880d), 2014-01-01
Supplement: c4tb00880d1.pdf [file c4tb00880d1.pdf]

# Supporting Information

## Er<sup>3+</sup>-doped YbPO<sub>4</sub> Up-conversion Porous Nanospheres for UCL/CT Bimodal Imaging *In Vivo* and Chemotherapy

Xiaopeng Zheng<sup>a,c</sup>, Liangjun Zhou<sup>a,c,d\*</sup>, Yang Bu<sup>c</sup>, Wenyan Yin<sup>a</sup>, Zhongbo Hu<sup>c</sup>, Meng Li<sup>a</sup>,  
Zhanjun Gu<sup>a,\*</sup>, Yuliang Zhao<sup>a,b\*</sup>

<sup>a</sup> Key Laboratory for Biomedical Effects of Nanomaterials and Nanosafety, Institute of High Energy Physics, Chinese Academy of Sciences, Beijing, 100049, P. R. China

<sup>b</sup> Key Laboratory for Biomedical Effects of Nanomaterials and Nanosafety, National Center for Nanoscience and Technology of China, Beijing, 100190, P. R. China

<sup>c</sup> College of Materials Science and Opto-Electronic Technology, University of Chinese Academy of Sciences, Beijing, 100049, P. R. China

<sup>d</sup> College of Aerospace and Materials Engineering, National University of Defense Technology, Changsha, 410073, P. R. China

\*Corresponding Authors: zhoulj@ihep.ac.cn, zjgu@ihep.ac.cn, zhaoyuliang@ihep.ac.cn

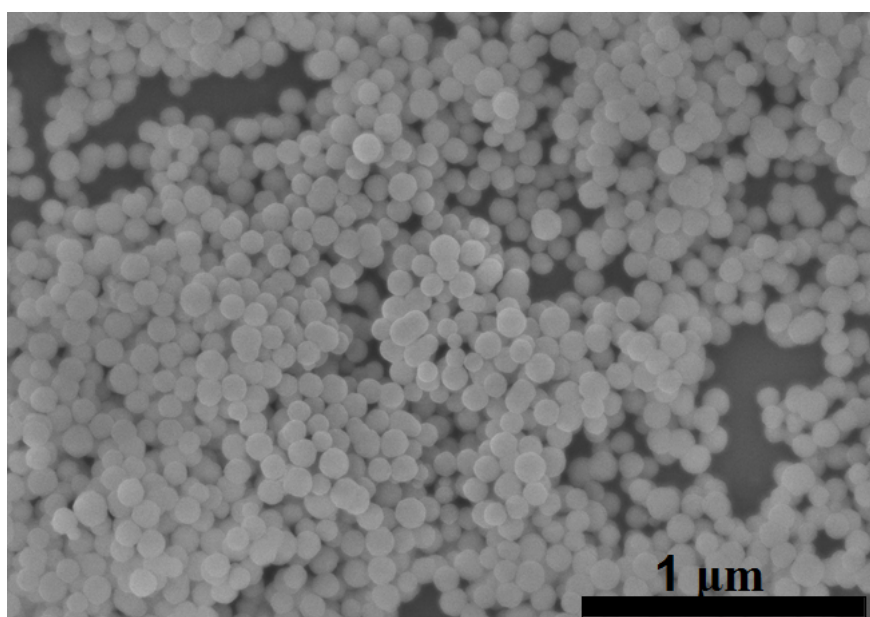

Fig. S1. SEM image of the as-obtained Yb carbonate precursors.

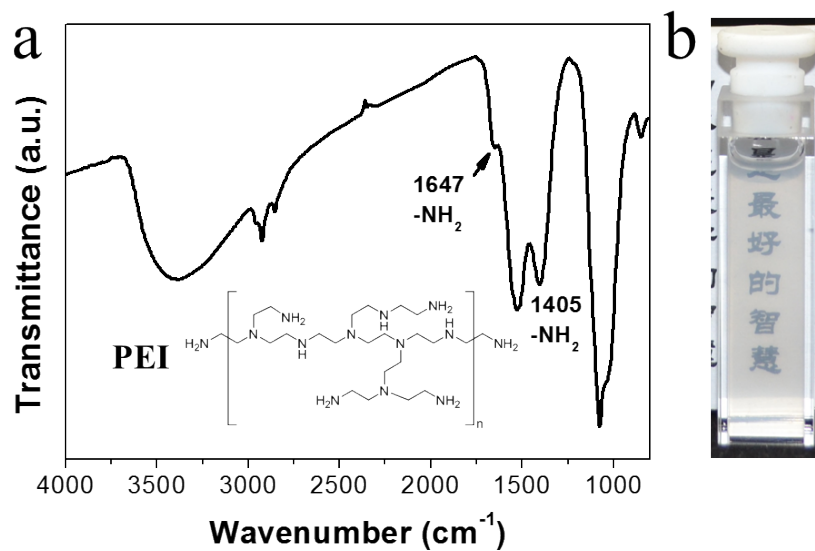

Fig. S2. (a) FT-IR spectrum of the as-obtained YbPO<sub>4</sub>:Er PEI-UCPSs. Inset: molecular structure of PEI. The bands at 2923 and 2853 cm<sup>-1</sup> are attributed to the stretching vibrations of the -CH<sub>2</sub>- group, respectively. In addition, peaks centered at 1649 and 1405 cm<sup>-1</sup> are ascribed to the internal vibrations of the amide group, demonstrating the successful PEI coating on YbPO<sub>4</sub>:Er UCPSs.<sup>1, 2</sup> (b) Digital image of PEI-YbPO<sub>4</sub>:Er UCPSs dispersed in water (1 mg/mL).

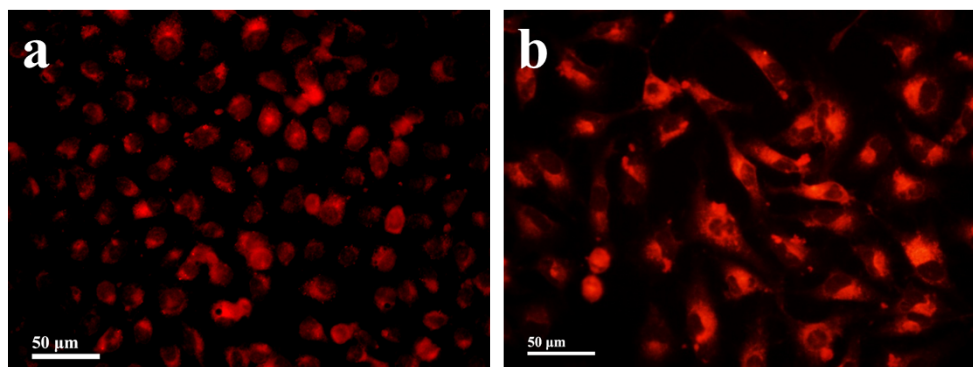

**Fig. S3** Cell fluorescence images showing cellular accumulation and distribution of PEI-UCPSs@DOX (100  $\mu\text{g}/\text{mL}$  for 1 h) in (a) 16HBE and (b) A549 cells.

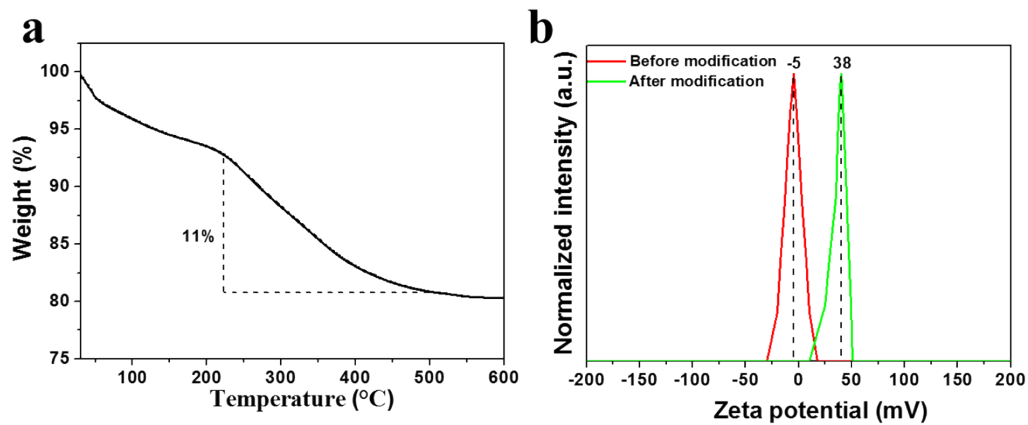

**Fig. S4** (a) The thermogravimetric analysis of PEI-UCPSs; (b) Zeta potential analysis of NPs before and after PEI-modification.

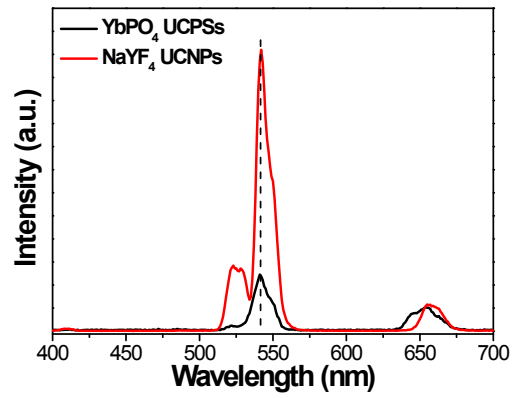

**Fig. S5** The comparison of UCL intensity between  $\text{YbPO}_4$  UCPSs and  $\text{NaYF}_4$  UCNPs.

References:

- 1 H. T. Wong, M. K. Tsang, C. F. Chan, K. L. Wong, B. Fei and J. Hao, *Nanoscale*, 2013, **5**, 3465.
- 2 D. Yang, X. Kang, P. Ma, Y. Dai, Z. Hou, Z. Cheng, C. Li and J. Lin, *Biomaterials*, 2013, **34**, 1601.
